# Supplementary material for: Effect of In-Situ H Doping on the Electrical Properties of In2O3 Thin-Film Transistors
Source: MDPI journal article supplement (doi:10.3390/electronics13081478), 2024-04-13
Supplement: s1 [file s1]

## Supplementary Materials

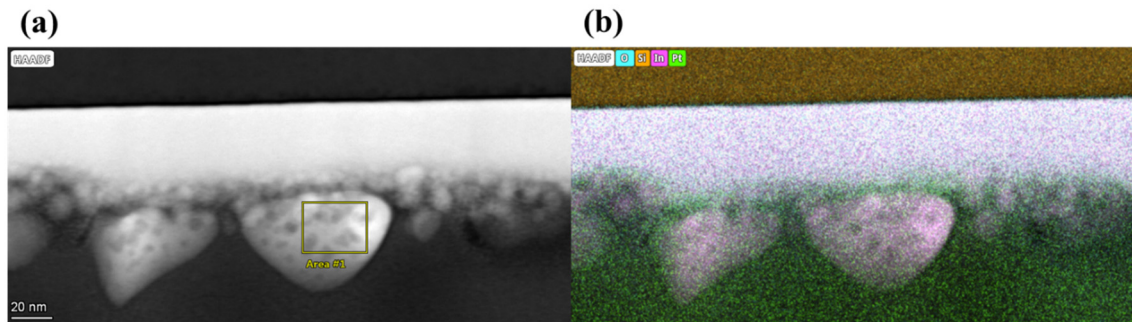

**Figure S1.** (a) HAADF image and (b) EDS mapping results of the as-deposited  $\text{In}_2\text{O}_3\text{:H}$  films at  $R[\text{H}_2]=5\%$ .
